# Supplementary material for: Ischemic stroke in the setting of supratherapeutic International Normalized Ratio following coronavirus disease 2019 infection: a case report
Source: Springer Nature journal article supplement (doi:10.1186/s13256-023-03936-8), 2023-05-31
Supplement: MOESM1 [file 25429414]

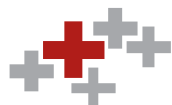

# CARE Checklist (2013) of information to include when writing a case report

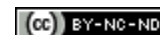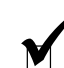

| Topic                           | Item | Checklist item description                                                                               | Reported on Page                                                    |
|---------------------------------|------|----------------------------------------------------------------------------------------------------------|---------------------------------------------------------------------|
| <b>Title</b>                    | 1    | The words “case report” should be in the title along with the area of focus .....                        | <u>Line 1</u>                                                       |
| <b>Key Words</b>                | 2    | 2 to 5 key words that identify areas covered in this case report. ....                                   | <u>Line 18-24</u>                                                   |
| <b>Abstract</b>                 | 3a   | Introduction—What is unique about this case? What does it add to the medical literature? .....           | <u>Line 12</u>                                                      |
|                                 | 3b   | The main symptoms of the patient and the important clinical findings .....                               | <u>Line 14-15</u>                                                   |
|                                 | 3c   | The main diagnoses, therapeutics interventions, and outcomes .....                                       | <u>Line 15</u>                                                      |
|                                 | 3d   | Conclusion—What are the main “take-away” lessons from this case? .....                                   | <u>Line 16</u>                                                      |
| <b>Introduction</b>             | 4    | One or two paragraphs summarizing why this case is unique with references .....                          | <u>Line 28-31</u>                                                   |
| <b>Patient Information</b>      | 5a   | De-identified demographic information and other patient specific information .....                       | <u>Line 36</u>                                                      |
|                                 | 5b   | Main concerns and symptoms of the patient .....                                                          | <u>Line 37</u>                                                      |
|                                 | 5c   | Medical, family, and psychosocial history including relevant genetic information (also see timeline). .. | <u>Line 39-42</u>                                                   |
|                                 | 5d   | Relevant past interventions and their outcomes .....                                                     | <u>Line 39</u>                                                      |
| <b>Clinical Findings</b>        | 6    | Describe the relevant physical examination (PE) and other significant clinical findings. ....            | <u>Line 38-39</u>                                                   |
| <b>Timeline</b>                 | 7    | Important information from the patient’s history organized as a timeline .....                           | <u>N/A</u>                                                          |
| <b>Diagnostic Assessment</b>    | 8a   | Diagnostic methods (such as PE, laboratory testing, imaging, surveys). ....                              | <u>Line 43-45</u>                                                   |
|                                 | 8b   | Diagnostic challenges (such as access, financial, or cultural) .....                                     | <u>N/A</u>                                                          |
|                                 | 8c   | Diagnostic reasoning including other diagnoses considered .....                                          | <u>Line 55</u>                                                      |
|                                 | 8d   | Prognostic characteristics (such as staging in oncology) where applicable .....                          | <u>N/A</u>                                                          |
| <b>Therapeutic Intervention</b> | 9a   | Types of intervention (such as pharmacologic, surgical, preventive, self-care) .....                     | <u>Line 59</u>                                                      |
|                                 | 9b   | Administration of intervention (such as dosage, strength, duration) .....                                | <u>Line 59</u>                                                      |
|                                 | 9c   | Changes in intervention (with rationale) .....                                                           | <u>N/A</u>                                                          |
| <b>Follow-up and Outcomes</b>   | 10a  | Clinician and patient-assessed outcomes (when appropriate) .....                                         | <u>Line 60-61</u>                                                   |
|                                 | 10b  | Important follow-up diagnostic and other test results .....                                              | <u>N/A</u>                                                          |
|                                 | 10c  | Intervention adherence and tolerability (How was this assessed?) .....                                   | <u>N/A</u>                                                          |
|                                 | 10d  | Adverse and unanticipated events .....                                                                   | <u>N/A</u>                                                          |
| <b>Discussion</b>               | 11a  | Discussion of the strengths and limitations in your approach to this case .....                          | <u>N/A</u>                                                          |
|                                 | 11b  | Discussion of the relevant medical literature. ....                                                      | <u>Line 73-75</u>                                                   |
|                                 | 11c  | The rationale for conclusions (including assessment of possible causes) .....                            | <u>Line 67-72</u>                                                   |
|                                 | 11d  | The primary “take-away” lessons of this case report. ....                                                | <u>Line 78-81</u>                                                   |
| <b>Patient Perspective</b>      | 12   | When appropriate the patient should share their perspective on the treatments they received .....        | <u>N/A</u>                                                          |
| <b>Informed Consent</b>         | 13   | Did the patient give informed consent? Please provide if requested .....                                 | Yes <input checked="" type="checkbox"/> No <input type="checkbox"/> |
